# Supplementary material
Source: publisher figshare collection journal article supplement (https://acs.figshare.com/ndownloader/files/20489469)
Supplement: Supplementary file 1 [file 20489469]

Supporting Information

for

Dragonfly-Wing-Inspired Inclined Irregular  
Conical Structures for Broadband  
Omnidirectional Antireflection Coatings

*Chen-Yu Chien, Yu-Han Chen, Ru-Yu Chen, and Hongta Yang\**

Department of Chemical Engineering, National Chung Hsing University, 145 Xingda  
Road, Taichung City 40227, Taiwan

\*Corresponding Author: E-mail: [hyang@dragon.nchu.edu.tw](mailto:hyang@dragon.nchu.edu.tw) (H. Yang)

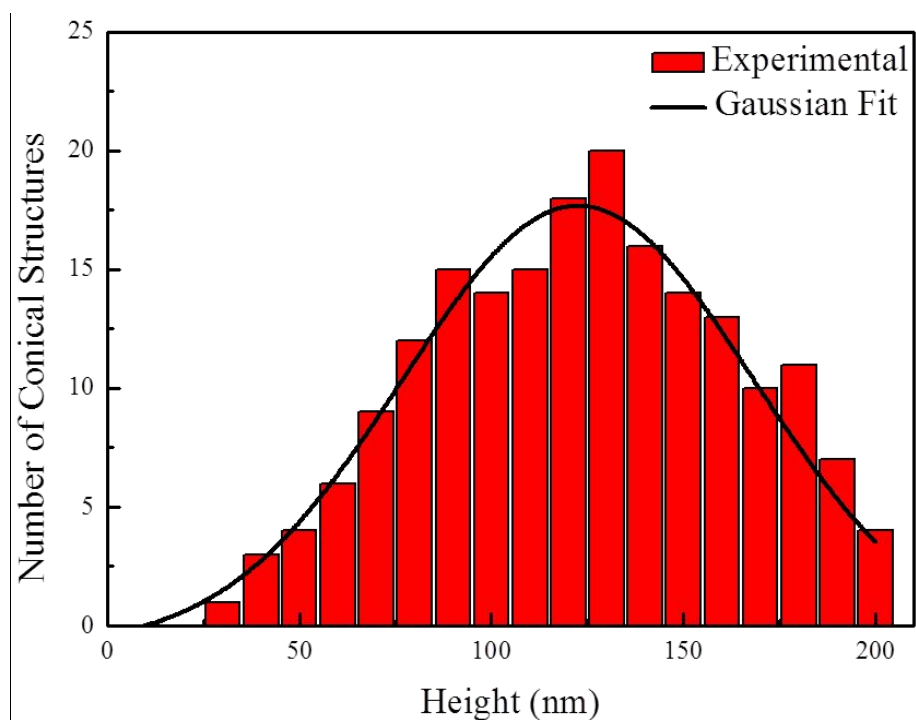

**Figure S1.** Statistical analysis of the conical structure height measured on the magnified SEM image of the dragonfly wing as displayed in Figure 1 (d). The histogram shows the height distribution of the conical structures. A Gaussian profile describes the experimental data

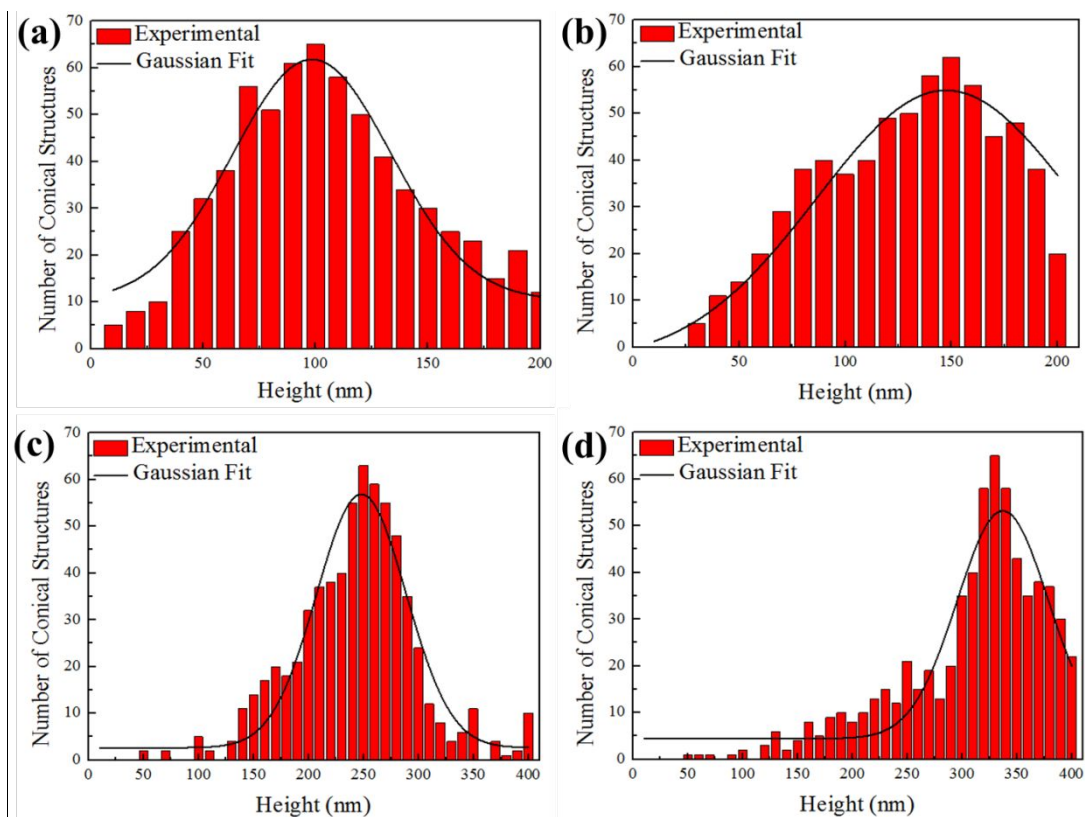

**Figure S2.** Statistical analyses of the PET conical structure heights at different RIE durations measured on the magnified SEM images as displayed in Figure 4. (a) 5 min, (b) 7.5 min, (c) 10 min, and (d) 12.5 min. The histogram shows the height distribution of the conical structures. A Gaussian profile describes the experimental data.

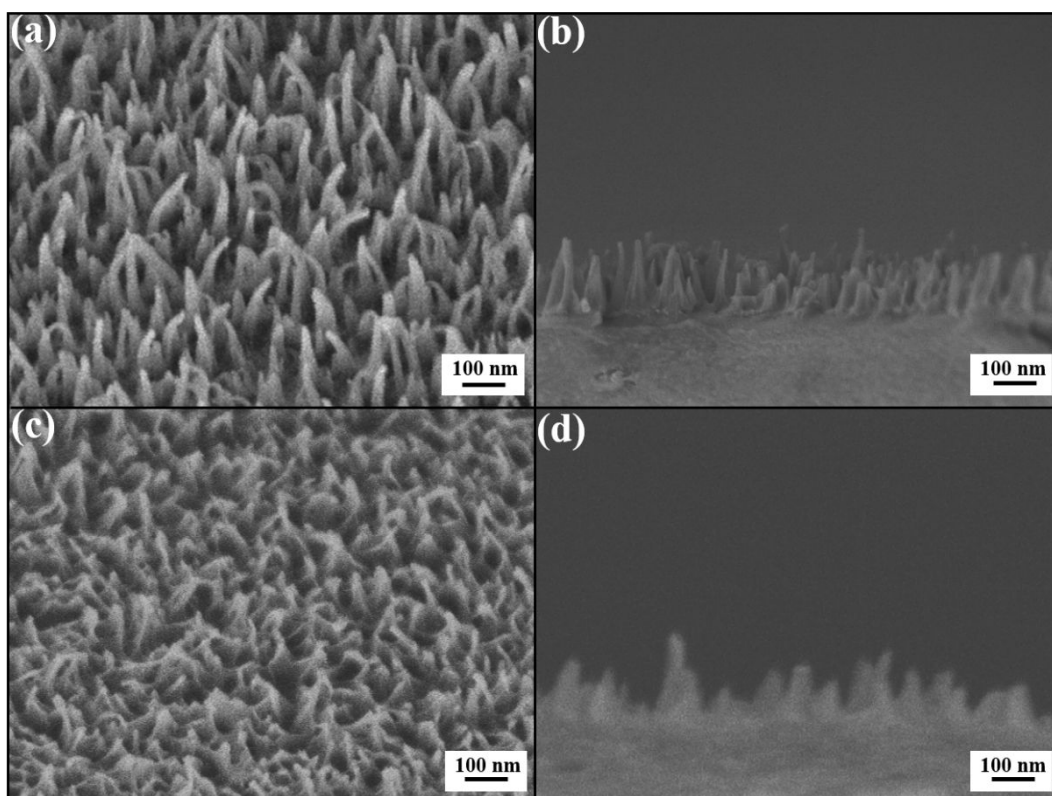

**Figure S3.** (a) Side-view SEM image and (b) cross-sectional SEM image of a PET substrate coated with PET conical structures after a 7.5 min RIE process. (c) Side-view SEM image and (d) cross-sectional SEM image of a dragonfly (*Orthetrum triangulare*) wing.

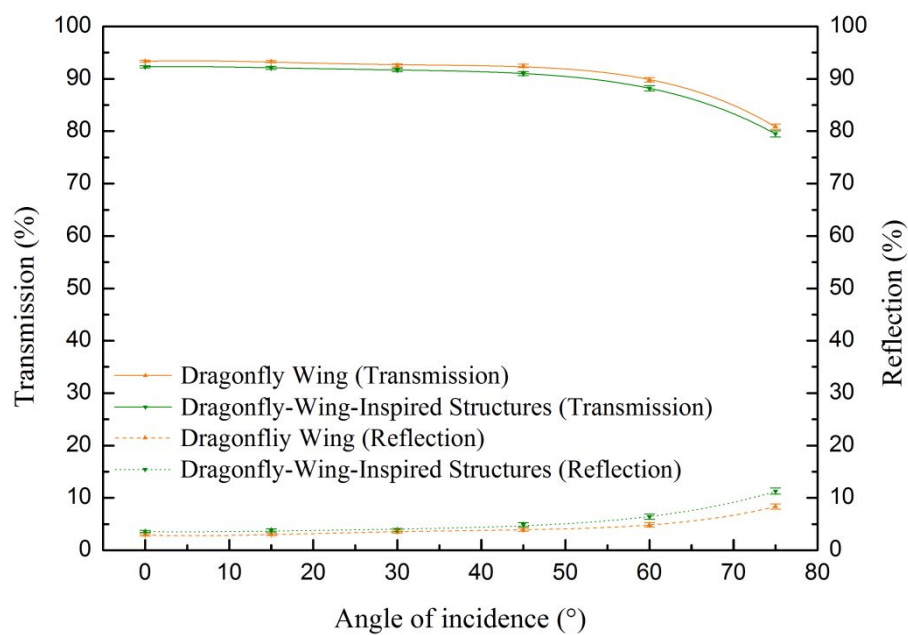

**Figure S4.** Optical reflection spectra and optical transmission spectra obtained from a dragonfly wing and a PET substrate coated with PET conical structures with a 7.5 min RIE treatment at various incidence angles.
